# Supplementary material
Source: PubMed Central journal article supplement (PMC8487911)
Supplement: NIHMS1691642-supplement-1.pdf [file NIHMS1691642-supplement-1.pdf]

Supplementary Figure 1. Bland-Altman plots for baseline and follow-up scores for HAQ-DI in from two PsA studies

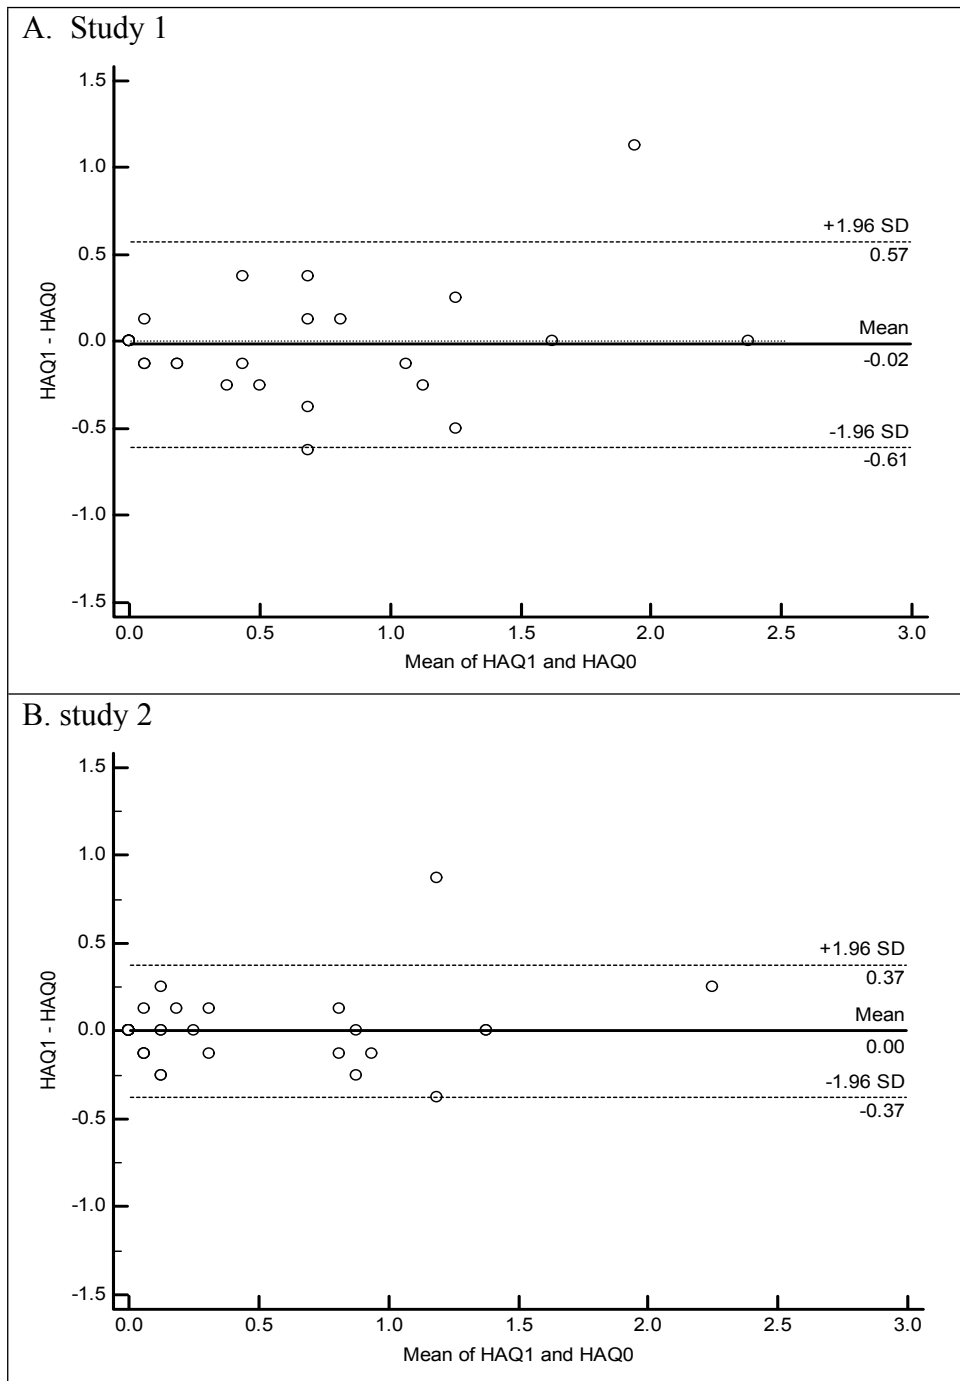

Legend: Bland-Altman's plot for HAQ-DI for baseline and retest time points for A. study 1 and B, study 2. The Y-axis represent the differences of HAQ-DI between retest time point (HAQ1) and baseline (HAQ0). The X-axis represents the mean of HAQ-DI scores between time points. The dispersion and 95% confidence intervals of differences in scores are shown as dotted lines.

Supplementary Figure 2. Bland-Altman plots for baseline and follow-up scores for SF-36 PF from one PsA study

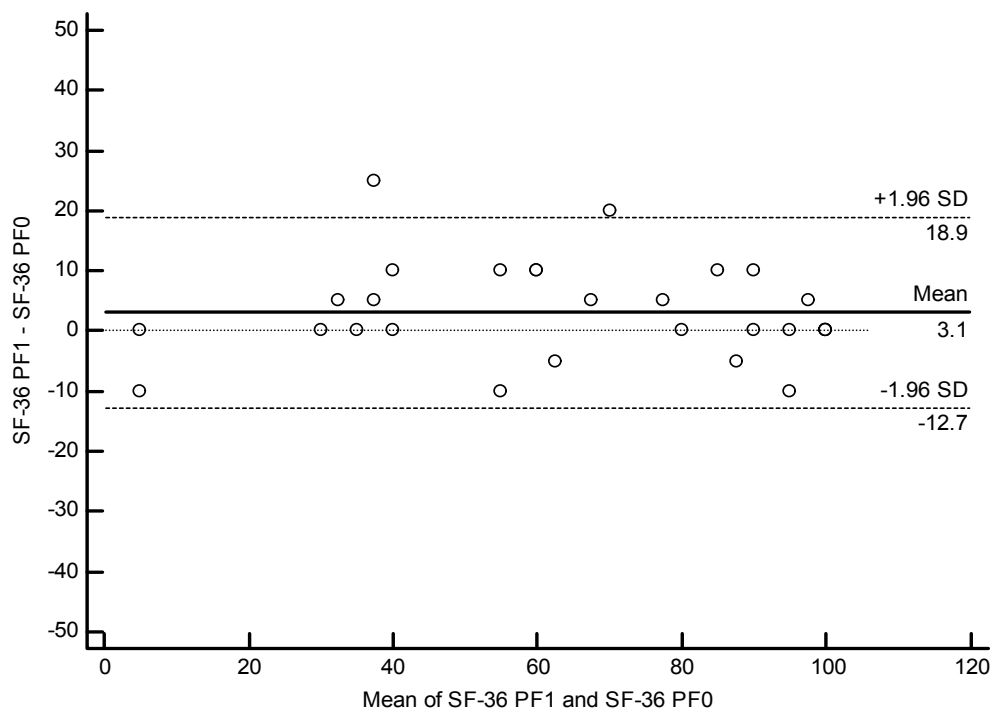

Legend: Bland-Altman's plot for SF-36 PF for baseline and retest time points for study 1. The Y-axis represent the differences of SF-36 PF between retest (SF-36 PF1) and baseline (SF-36 PF0) time point. The X-axis represents the mean of SF-36 PF scores between baseline and retest time points. The dispersion and 95% confidence intervals of differences in scores are shown as dotted lines.
